# Supplementary material for: Th17/1 and ex-Th17 cells are detected in patients with polyarticular juvenile arthritis and increase following treatment
Source: Springer Nature journal article supplement (doi:10.1186/s12969-024-00965-5), 2024-03-02
Supplement: MOESM2 [file 26811116]

## Supplemental Methods: Antibodies

### Th17 Panel

| Marker       | Fluorophore   | Clone   | Company   | Catalog# |
|--------------|---------------|---------|-----------|----------|
| IL-17        | FITC          | N49-653 | BD        | 560488   |
| IFN $\gamma$ | PE            | B27     | BD        | 559327   |
| CD4          | PerCP         | RPA-T4  | BD        | 560650   |
| IL-22        | PECy7         | 2G12A41 | Biologend | 366708   |
| IL-21        | APC           | 3A3-N21 | BD        | 560493   |
| CD3          | APCCy7        | SK7     | BD        | 557832   |
| TNF $\alpha$ | BV421         | MAB11   | BD        | 562783   |
| Live/Dead    | Zombie Yellow | -       | Biologend | 423104   |

### Treg Panel

| Marker | Fluorophore | Clone  | Company    | Catalog#   | Isotype Clone | Company      | Catalog#   |
|--------|-------------|--------|------------|------------|---------------|--------------|------------|
| HELIOS | FITC        | 22F6   | Invitrogen | 11-9883-80 | eBio299ARM    | eBiosciences | 11-4888-81 |
| FOXP3  | PE          | 206D   | Biologend  | 320108     | MOPC-21       | Biologend    | 400140     |
| CD4    | PerCP       | RPA-T4 | BD         | 560650     | -             | -            | -          |
| CD73   | PECy7       | AD2    | BD         | 561258     | MOPC-21       | BD           | 557872     |
| CD25   | APC         | BC96   | Biologend  | 302610     | eBM2a         | eBiosciences | 50-4724-80 |
| CD39   | APCCy7      | A1     | Biologend  | 328225     | MOPC-21       | Biologend    | 400128     |
| CD3    | BV510       | UCHT1  | BD         | 563109     | -             | -            | -          |

### STAT Panel

| Antibodies  | Fluorophore | Clone           | Company | Catalog# |
|-------------|-------------|-----------------|---------|----------|
| pSTAT3 Y705 | PE          | 4/P-STAT3       | BD      | 562072   |
| CD4         | PECy7       | SK3             | BD      | 557852   |
| pSTAT1 Y701 | APC         | 4a              | BD      | 562070   |
| CD3         | APCCy7      | SK7             | BD      | 557832   |
| pSTAT5 Y694 | BV421       | 47/Stat5(pY694) | BD      | 562984   |
| CD8         | BV510       | RPA-T8          | BD      | 563256   |

### Th17/1 and ex-Th17 Panel

| Antibodies   | Fluorophore   | Clone   | Company   | Catalog# | Isotype Clone | Company   | Catalog# |
|--------------|---------------|---------|-----------|----------|---------------|-----------|----------|
| IL-17        | FITC          | N49-653 | BD        | 560488   | N49-653       | BD        | 560488   |
| IFN $\gamma$ | PE            | B27     | BD        | 559327   | B27           | BD        | 559327   |
| CD4          | PerCP         | RPA-T4  | BD        | 560650   | -             | -         | -        |
| CD161        | APC           | DX12    | BD        | 550968   | DX12          | BD        | 550968   |
| CD3          | APCCy7        | SK7     | BD        | 557832   | -             | -         | -        |
| CCR6         | BV421         | G034E3  | Biologend | 353408   | G034E3        | Biologend | 353408   |
| Live/Dead    | Zombie Yellow | -       | Biologend | 423104   | -             | -         | -        |
